# Supplementary material
Source: publisher figshare collection journal article supplement (https://sage.figshare.com/ndownloader/files/12580508)
Supplement: Supplementary file 1 [file 12580508]

Archive with 5 entries (5 files):
- Supp/Supplemental Data 2.pdf
- Supp/Supplemental Data 3.pdf
- Supp/Supplemental Data 4.pdf
- Supp/Supplemental Data 5.pdf
- Supp/Supplemental Data 6.pdf
