# Supplementary material
Source: publisher figshare collection journal article supplement (https://sage.figshare.com/ndownloader/files/12580508)
Supplement: Supplementary file 1 [file 12580508 › Supp/Supplemental Data 2.pdf]

**Supplemental Data 2.** Age-standardised hospital morbidity rates in men in the European Union, 2000-2014.

| <b>Countries</b> | <b>2000</b> | <b>2001</b> | <b>2002</b> | <b>2003</b> | <b>2004</b> | <b>2005</b> | <b>2006</b> | <b>2007</b> | <b>2008</b> | <b>2009</b> | <b>2010</b> | <b>2011</b> | <b>2012</b> | <b>2013</b> | <b>2014</b> |
|------------------|-------------|-------------|-------------|-------------|-------------|-------------|-------------|-------------|-------------|-------------|-------------|-------------|-------------|-------------|-------------|
| European Union   | 38.40       | 41.54       | 43.60       | 47.65       | 48.79       | 48.78       | 48.52       | 48.19       | 47.76       | 46.45       | 41.13       | 45.94       | 44.59       | 41.68       | 34.74       |
| Austria          | 26.14       | 95.38       | 104.67      | 109.74      | 128.77      | 101.93      | 114.23      | 107.13      | 108.05      | 113.57      | 92.34       | 76.70       | 62.65       | 52.56       | 43.04       |
| Belgium          | 69.33       | 70.20       | 93.78       | 126.74      | 134.18      | 144.67      | 145.81      | 152.01      | 146.84      | 141.27      | -           | 241.72      | 238.21      | 231.42      | -           |
| Croatia          | -           | -           | 18.92       | 12.81       | 17.70       | 19.07       | 16.09       | 15.67       | 13.63       | 11.95       | 7.23        | 14.41       | 12.32       | 16.22       | 17.44       |
| Cyprus           | -           | -           | -           | -           | -           | 2.35        | 1.28        | 1.89        | -           | -           | 1.58        | 1.96        | 0.91        | 4.03        | -           |
| Czech Republic   | 54.73       | 59.01       | 61.16       | 61.87       | 69.72       | 67.22       | 62.94       | 61.46       | 68.68       | 75.47       | 81.04       | 91.25       | 99.78       | 93.05       | 102.45      |
| Denmark          | 5.45        | 6.04        | 7.14        | 6.45        | 8.76        | 6.59        | 7.28        | 8.84        | 8.27        | 8.27        | 6.42        | 6.00        | 6.37        | 3.33        | 2.71        |
| Finland          | -           | 232.41      | 226.82      | 274.06      | 279.60      | 302.03      | 345.55      | 358.98      | 334.80      | 333.53      | 325.84      | 314.47      | 339.34      | 341.02      | 345.39      |
| France           | 78.66       | 56.95       | 61.39       | 63.69       | 75.69       | 85.01       | 78.41       | 71.20       | 68.40       | 56.91       | 43.48       | 42.75       | 33.53       | 28.46       | 23.84       |
| Germany          | 28.99       | 36.98       | 40.54       | 48.38       | 49.42       | 51.32       | 52.42       | 55.12       | 54.69       | 54.38       | 55.16       | 56.05       | 57.65       | 53.71       | 54.29       |
| Hungary          | -           | -           | -           | -           | 12.86       | 16.74       | 14.29       | 9.20        | 8.77        | 12.61       | 15.33       | 16.70       | 14.10       | 15.99       | 14.82       |
| Ireland          | 34.03       | 34.29       | 45.77       | 38.63       | 31.16       | 23.90       | 29.49       | 20.22       | 30.91       | 26.24       | 21.29       | 25.35       | 34.63       | 26.15       | 27.76       |
| Italy            | -           | 40.60       | 41.12       | 45.50       | 43.12       | 42.89       | 43.79       | 43.15       | 40.75       | 38.90       | 35.56       | 30.21       | 27.25       | 24.51       | 21.94       |
| Latvia           | -           | -           | -           | -           | 0.28        | 2.15        | 1.04        | 1.58        | 1.62        | 2.03        | 0.91        | 1.38        | 2.13        | 2.38        | 8.76        |
| Lithuania        | -           | 10.03       | 11.00       | 12.75       | 14.21       | 12.12       | 16.84       | 23.79       | 22.70       | 18.60       | 25.87       | 24.76       | 24.91       | 29.91       | 24.79       |
| Luxembourg       | -           | -           | 71.20       | 55.68       | 109.26      | 112.44      | 57.04       | 61.18       | 68.27       | 60.30       | 63.50       | 46.42       | 48.43       | -           | -           |
| Netherlands      | -           | -           | -           | -           | 1.53        | 2.55        | 3.36        | 3.27        | 3.45        | 5.36        | 4.30        | 7.22        | 30.55       | -           | -           |
| Poland           | -           | -           | -           | -           | -           | 14.11       | 14.79       | 16.54       | 21.46       | 33.87       | 37.23       | 34.90       | 36.54       | 32.71       | 10.92       |
| Portugal         | 7.63        | 6.23        | 6.33        | 7.36        | 5.14        | 7.34        | 5.39        | 4.39        | 5.06        | 6.12        | 5.61        | 5.16        | 6.67        | 5.83        | 5.89        |
| Slovakia         | 3.49        | 3.52        | 5.62        | 9.74        | 11.68       | 10.72       | 9.87        | 10.23       | 6.30        | 6.52        | 7.77        | 10.41       | 10.81       | -           | 12.20       |
| Slovenia         | -           | -           | -           | -           | 49.29       | 54.58       | 57.03       | 75.45       | 55.03       | 53.52       | 60.36       | 64.99       | 83.98       | 83.99       | 80.34       |
| Spain            | 1.59        | 3.25        | 3.41        | 3.26        | 14.10       | 15.59       | 16.65       | 17.15       | 17.83       | 17.65       | 16.33       | 22.93       | 22.82       | 16.35       | 21.04       |
| United Kingdom   | 39.72       | 45.08       | 43.90       | 42.04       | 40.27       | 39.99       | 36.44       | 36.97       | 38.79       | 38.07       | 38.73       | 39.66       | 33.09       | 32.05       | 31.58       |
