# Supplementary material
Source: publisher figshare collection journal article supplement (https://sage.figshare.com/ndownloader/files/12580508)
Supplement: Supplementary file 1 [file 12580508 › Supp/Supplemental Data 3.pdf]

**Supplemental Data 3.** Age-standardised hospital morbidity rates in women in the European Union, 2000-2014.

| <b>Countries</b> | <b>2000</b> | <b>2001</b> | <b>2002</b> | <b>2003</b> | <b>2004</b> | <b>2005</b> | <b>2006</b> | <b>2007</b> | <b>2008</b> | <b>2009</b> | <b>2010</b> | <b>2011</b> | <b>2012</b> | <b>2013</b> | <b>2014</b> |
|------------------|-------------|-------------|-------------|-------------|-------------|-------------|-------------|-------------|-------------|-------------|-------------|-------------|-------------|-------------|-------------|
| European Union   | 44.15       | 47.06       | 50.12       | 53.81       | 57.01       | 56.61       | 54.35       | 53.83       | 54.61       | 53.19       | 45.88       | 50.48       | 48.51       | 45.66       | 36.66       |
| Austria          | 27.27       | 112.43      | 104.79      | 108.37      | 126.09      | 110.01      | 94.95       | 101.74      | 104.96      | 118.94      | 103.86      | 84.36       | 65.90       | 58.56       | 48.85       |
| Belgium          | 70.58       | 77.15       | 96.78       | 134.62      | 151.74      | 154.67      | 165.90      | 172.66      | 166.92      | 166.72      | -           | 298.69      | 280.36      | 279.62      | -           |
| Croatia          | -           | -           | 26.38       | 24.64       | 24.41       | 25.62       | 19.92       | 22.88       | 17.15       | 15.15       | 12.21       | 16.34       | 11.10       | 14.83       | 18.64       |
| Cyprus           | -           | -           | -           | -           | -           | 0.97        | 0.75        | 0.89        | -           | -           | 0.82        | 2.32        | 3.13        | 1.64        | -           |
| Czech Republic   | 67.95       | 67.76       | 72.55       | 73.44       | 83.50       | 83.81       | 81.04       | 80.34       | 93.01       | 93.65       | 105.61      | 113.11      | 120.19      | 116.33      | 117.12      |
| Denmark          | 5.29        | 3.92        | 5.05        | 6.48        | 4.94        | 5.98        | 7.15        | 4.85        | 6.05        | 5.47        | 5.72        | 5.83        | 5.40        | 4.41        | 2.86        |
| Finland          | -           | 209.89      | 222.02      | 244.40      | 242.31      | 277.56      | 295.92      | 318.39      | 319.48      | 302.90      | 303.74      | 287.95      | 305.43      | 297.06      | 310.89      |
| France           | 96.92       | 66.88       | 73.93       | 77.08       | 98.09       | 106.92      | 97.54       | 88.38       | 89.84       | 75.95       | 52.94       | 46.35       | 37.87       | 33.33       | 28.57       |
| Germany          | 31.52       | 39.13       | 44.76       | 50.13       | 53.09       | 55.29       | 54.04       | 57.78       | 58.05       | 56.22       | 56.05       | 58.18       | 58.86       | 55.51       | 54.62       |
| Hungary          | -           | -           | -           | -           | 17.32       | 19.46       | 16.41       | 11.04       | 9.88        | 11.62       | 14.11       | 12.19       | 16.17       | 13.44       | 15.87       |
| Ireland          | 44.35       | 49.14       | 49.42       | 52.44       | 46.60       | 45.00       | 37.78       | 29.93       | 38.57       | 35.68       | 32.29       | 27.61       | 35.67       | 37.46       | 29.06       |
| Italy            | -           | 52.36       | 51.79       | 54.69       | 52.29       | 55.05       | 52.72       | 51.26       | 51.40       | 48.99       | 43.58       | 37.71       | 33.69       | 29.86       | 25.37       |
| Latvia           | -           | -           | -           | -           | 2.28        | 0.98        | 0.68        | 0.60        | 1.24        | 2.06        | 2.19        | 3.64        | 1.71        | 2.57        | 19.44       |
| Lithuania        | -           | 8.66        | 9.09        | 9.87        | 23.04       | 20.35       | 19.81       | 19.45       | 23.88       | 22.77       | 27.66       | 32.22       | 30.12       | 34.69       | 30.72       |
| Luxembourg       | -           | -           | 73.70       | 87.70       | 88.58       | 73.44       | 62.43       | 57.70       | 53.69       | 56.17       | 45.34       | 59.79       | 43.75       | -           | -           |
| Netherlands      | -           | -           | -           | -           | 2.50        | 3.08        | 2.93        | 4.03        | 4.97        | 5.53        | 5.00        | 7.98        | 28.15       | -           | -           |
| Poland           | -           | -           | -           | -           | -           | 16.71       | 17.07       | 16.74       | 24.94       | 38.38       | 40.53       | 38.42       | 42.86       | 37.36       | 12.05       |
| Portugal         | 4.82        | 7.88        | 6.50        | 6.29        | 5.44        | 6.17        | 6.44        | 5.34        | 5.02        | 6.50        | 6.77        | 6.16        | 6.55        | 5.54        | 6.43        |
| Slovakia         | 3.95        | 5.93        | 5.14        | 7.29        | 13.43       | 14.29       | 7.47        | 7.42        | 7.93        | 7.80        | 7.59        | 10.13       | 10.19       | -           | 11.62       |
| Slovenia         | -           | -           | -           | -           | 26.87       | 29.46       | 55.66       | 54.89       | 56.23       | 59.74       | 70.93       | 83.15       | 76.28       | 83.11       | 86.34       |
| Spain            | 3.13        | 2.86        | 2.92        | 3.80        | 19.10       | 19.67       | 20.55       | 21.19       | 20.67       | 20.80       | 19.78       | 23.97       | 25.19       | 19.58       | 23.33       |
| United Kingdom   | 43.37       | 45.49       | 46.64       | 45.80       | 45.11       | 42.42       | 39.25       | 38.81       | 36.26       | 39.23       | 38.99       | 39.04       | 32.29       | 29.37       | 31.09       |
