# Supplementary material
Source: publisher figshare collection journal article supplement (https://sage.figshare.com/ndownloader/files/12580508)
Supplement: Supplementary file 1 [file 12580508 › Supp/Supplemental Data 4.pdf]

**Supplemental Data 4.** Joinpoint analysis for dementia hospital morbidity trends in the European Union, 2000-2014.

|                | Total study period |                                         | Period 1  |                                         | Period 2  |                                         | Period 3  |                                         |
|----------------|--------------------|-----------------------------------------|-----------|-----------------------------------------|-----------|-----------------------------------------|-----------|-----------------------------------------|
|                | Years              | APC <sup>a</sup> (95% CI <sup>b</sup> ) | Years     | APC <sup>a</sup> (95% CI <sup>b</sup> ) | Years     | APC <sup>a</sup> (95% CI <sup>b</sup> ) | Years     | APC <sup>a</sup> (95% CI <sup>b</sup> ) |
| European Union | 2000-2014          | -3.9* (-4.2, -3.7)                      | -         | -                                       | -         | -                                       | -         | -                                       |
| Austria        | 2000-2014          | -1.7* (-3.3, -0.1)                      | 2000-2002 | -19.9 (-36.3, 0.8)                      | 2002-2014 | -0.2 (-1.5, 1.2)                        | -         | -                                       |
| Belgium        | 2000-2013          | -8.3* (-10.4, -6.3)                     | 2000-2004 | -5.3* (-7.5, -2.9)                      | 2004-2007 | -19.8* (-25.7, -13.4)                   | 2007-2013 | -1.3 (-2.5, 0.0)                        |
| Croatia        | 2002-2014          | -0.1 (-1.1, 0.8)                        | -         | -                                       | -         | -                                       | -         | -                                       |
| Cyprus         | 2005-2013          | 89.0* (6.1, 236.5)                      | -         | -                                       | -         | -                                       | -         | -                                       |
| Czech Republic | 2000-2014          | -1.4* (-2.0, -0.8)                      | 2000-2011 | -0.7* (-1.4, -0.1)                      | 2011-2014 | -5.7* (-10.2, -1.0)                     | -         | -                                       |
| Denmark        | 2000-2014          | -4.8* (-6.5, -3.2)                      | 2000-2002 | 19.8* (0.4, 43.0)                       | 2002-2014 | -6.5* (-7.5, -5.5)                      | -         | -                                       |
| Finland        | 2001-2014          | -4.2* (-4.5, -3.8)                      | -         | -                                       | -         | -                                       | -         | -                                       |
| France         | 2000-2014          | -0.7 (-1.7, 0.2)                        | 2000-2008 | 1.8* (1.0, 2.6)                         | 2008-2014 | -4.4* (-5.6, -3.2)                      | -         | -                                       |
| Germany        | 2000-2014          | -7.1* (-7.5, -6.6)                      | 2000-2007 | -8.2* (-9.3, -7.1)                      | 2007-2014 | -5.9* (-7.0, -4.7)                      | -         | -                                       |
| Hungary        | 2004-2014          | -4.3* (-5.6, -3.1)                      | -         | -                                       | -         | -                                       | -         | -                                       |
| Ireland        | 2000-2014          | 2.9* (0.7, 5.0)                         | -         | -                                       | -         | -                                       | -         | -                                       |
| Italy          | 2001-2014          | -7.4* (-7.9, -6.9)                      | 2001-2004 | -11.1* (-13.6, -8.6)                    | 2004-2014 | -6.7* (-7.1, -6.3)                      | -         | -                                       |
| Latvia         | 2004-2014          | 4.9* (2.0, 7.8)                         | -         | -                                       | -         | -                                       | -         | -                                       |
| Lithuania      | 2001-2014          | -9.2* (-11.3, -7.0)                     | -         | -                                       | -         | -                                       | -         | -                                       |
| Luxembourg     | 2002-2014          | -2.2* (-3.2, -1.1)                      | -         | -                                       | -         | -                                       | -         | -                                       |
| Netherlands    | 2004-2012          | -4.3* (-7.2, -1.3)                      | 2004-2010 | -1.1 (-3.4, 1.2)                        | 2010-2012 | -17.4* (-28.0, -5.3)                    | -         | -                                       |
| Poland         | 2005-2014          | -0.9 (-2.3, 0.6)                        | -         | -                                       | -         | -                                       | -         | -                                       |
| Portugal       | 2000-2014          | -3.6* (-5.0, -2.2)                      | 2000-2003 | -7.7* (-14.3, -0.6)                     | 2003-2008 | 2.4 (-2.2, 7.4)                         | 2008-2014 | -8.9* (-11.1, -6.6)                     |
| Slovakia       | 2000-2014          | -0.3 (-1.0, 0.4)                        | -         | -                                       | -         | -                                       | -         | -                                       |
| Slovenia       | 2004-2014          | 0.7 (-1.1, 2.6)                         | 2004-2006 | 12.9 (-8.3, 38.9)                       | 2006-2014 | -0.9 (-3.1, 1.4)                        | -         | -                                       |
| Spain          | 2000-2014          | -4.2* (-4.9, -3.5)                      | -         | -                                       | -         | -                                       | -         | -                                       |
| United Kingdom | 2000-2014          | -4.8* (-5.6, -4.0)                      | 2000-2004 | -2.4 (-5.3, 0.6)                        | 2004-2007 | -11.2* (-19.2, -2.4)                    | 2007-2014 | -2.0* (-3.3, -0.8)                      |

Abbreviations: APC: annual percent change; CI: confidence interval. \*p-value<0.05 for change in trend.
