# Supplementary material
Source: publisher figshare collection journal article supplement (https://sage.figshare.com/ndownloader/files/12580508)

## Supplemental Data 6. Trends in hospital morbidity from dementia in the member countries of the European Union, 2000-2014.

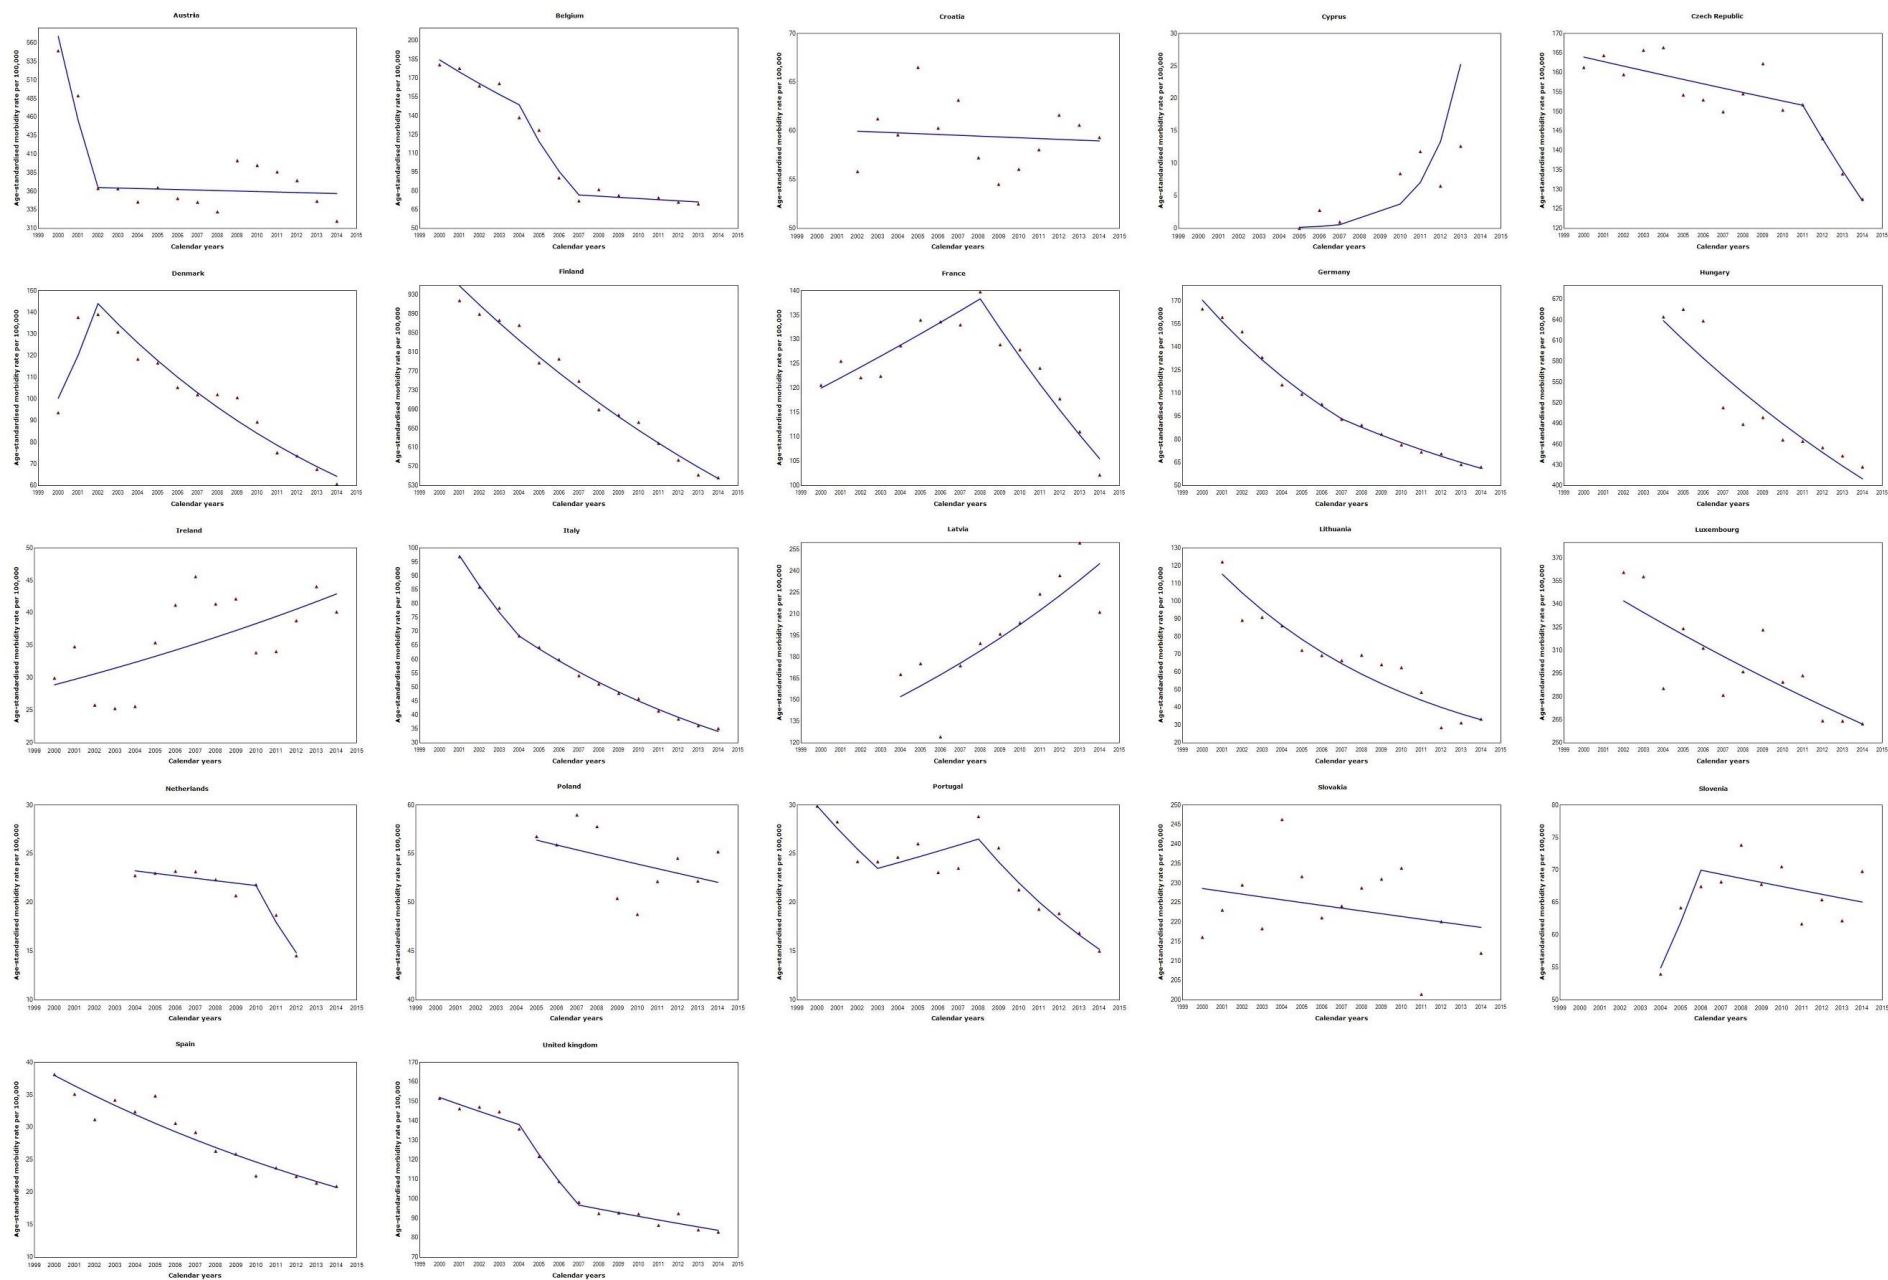

Supplement: Supplementary file 1 [file 12580508 › Supp/Supplemental Data 6.pdf]
