# Supplementary material
Source: publisher figshare collection journal article supplement (https://sage.figshare.com/ndownloader/files/12580508)

**Supplemental Data 5.** Trends in hospital morbidity from dementia in the entire European Union, 2000-2014.

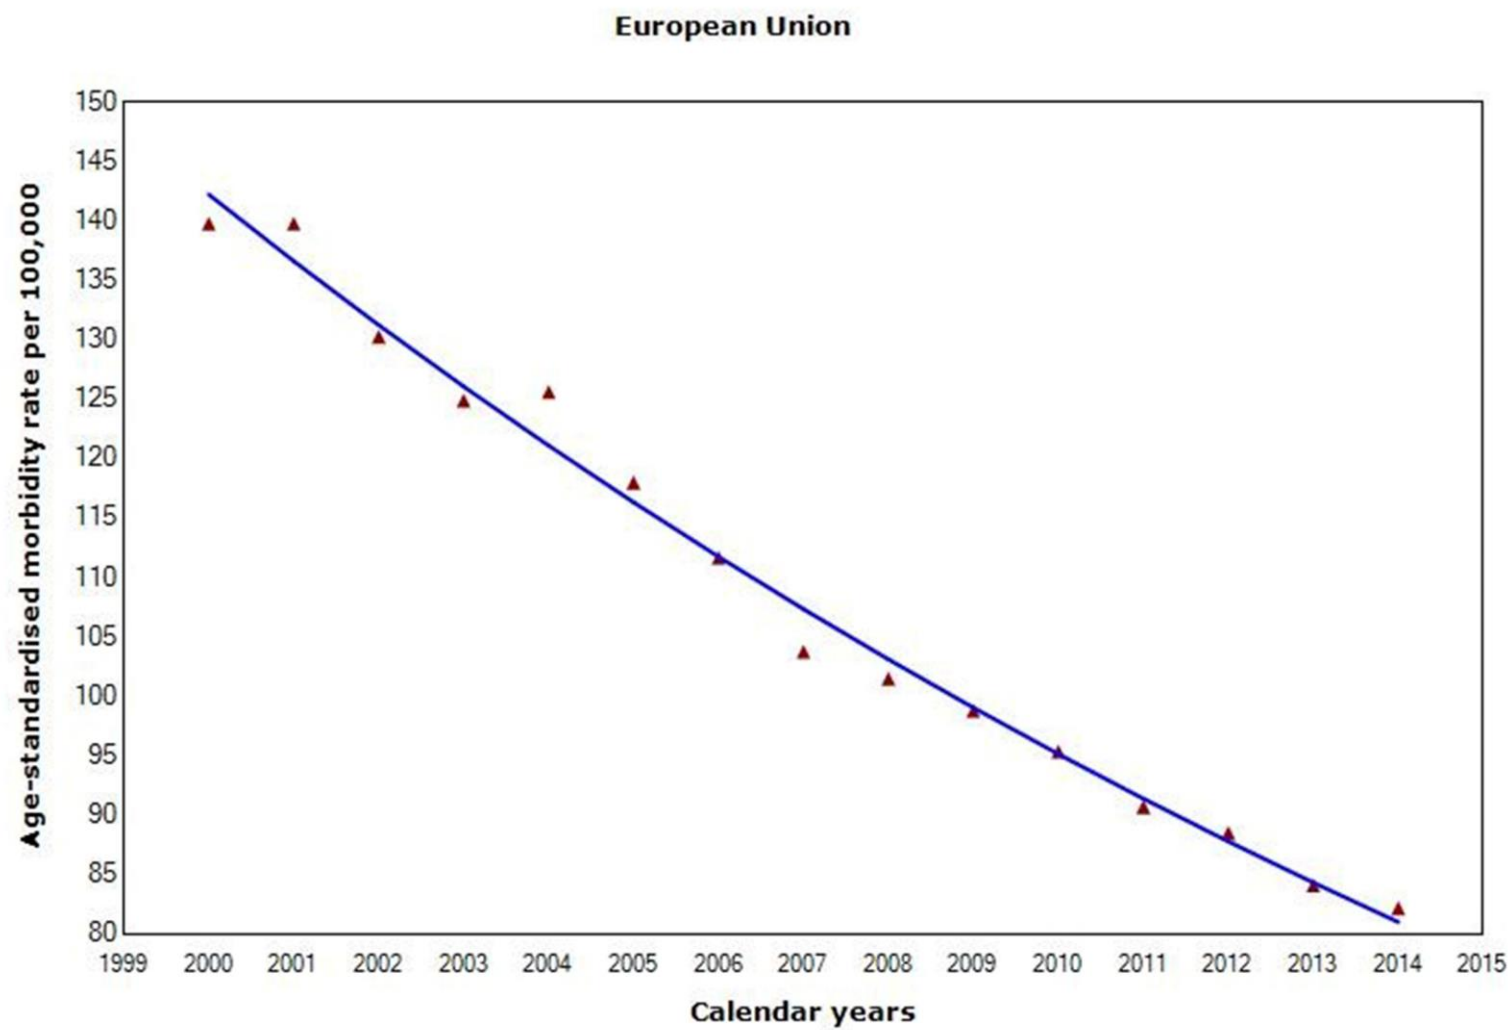

Supplement: Supplementary file 1 [file 12580508 › Supp/Supplemental Data 5.pdf]
